# Supplementary material
Source: publisher site journal article supplement (https://static.cambridge.org/content/id/urn:cambridge.org:id:article:S1047951120003157/resource/name/S1047951120003157supp001.xlsx)
Supplement: Supplementary file 1 [file S1047951120003157supp001.xlsx]

## Sheet: Sheet1
Patient ID	Diagnosis	Age (Yr./Mo)	Sex(F/M)	Time since onset (Yr./Mo)	Course	Cons.	FH of HCM	Wt(Kg)	Ht(Cm)	Clinical Features	NYHA/ROSS	LVEDD(mm)	LVEDD Z score	LVESD(mm)	LVESD Z score	IVS(mm)	IVS Z score	LVWT(mm)	LVWT Z score	LVOT PG (mmHg)	EF(%)	FS(%)	Hypertrophy pattern	Thickest part	Thickest part Z score	Variant detected
193	HOCM	4yr	F	3yr	Pr	Y	1 Sib	14	97	Dyspnea, Hepatomegaly	II	26	-2.06	14	-2.64	17	16	0.9	5.5	60	80	46	ASH	.	.	N
196	HOCM	1yr	F	1yr	Pr	Y	1 Sib, Mother	9	75	Recurrent chest infection	N	24	-0.95	14	-1.2	1.1	8.9	6	2.44	30	79	39	ASH	.	.	N
199	HCM	14yr	M	10yr	St	Y	1 Sib	40	143	Dyspnea	N	37.4	-1.46	23.6	-1.25	1.93	14.16	9	1.71	.	67	37	ASH	.	.	Y
202	HCM	1yr	F	1yr	St	Y	-	8	62	Dyspnea	N	25	0.63	14	-0.4	11	10.14	9	7.54	20	77	44	ASH	17	18.7	Y
208	HCM	2yr	M	1.5yr	St	Y	-	5.5	52	Dyspnea	I	12	-4.85	7	-4.13	11.4	10.86	4.9	2.36	.	80	40	ASH	.	.	N
211	HCM	13yr	F	9yr	Pr	Y	-	39	145	Dyspnea, Syncope	N	29	-4.07	19	-2.89	33	29.3	21	10.8	.	64	33	ASH	.	.	N
214	HCM	3yr	M	2yr	St	Y	-	10.5	86	Dyspnea, Hepatomegaly	II	28	-0.26	20	1.07	8	4.64	6	1.87	.	57	30	Concentric	.	.	Y
217	HCM	3yr	M	3yr	St	Y	-	13	87	Recurrent chest infection, Dyspnea	I	21	-3.6	9	-4.76	12	9.84	7	2.97	13	89	65	ASH	16	15.13	Y
226	HOCM	9mo	M	3mo	St	Y	-	7	65	Recurrent chest infection, Dyspnea	N	20	-1.48	11	-1.9	12.9	12.86	10	9.08	55	76	42	ASH	17	18.7	N
229	HCM	12yr	M	9yr	St	Y	2 Sibs	29	142	Dyspnea, Hepatomegaly	II	66.1	7.74	59.5	12.24	16.6	11.03	17.1	9.09	.	26	13	Concentric	.	.	N
232	HOCM	12yr	M	8yr	St	Y	-	31.5	144	Dyspnea	I	46	1.69	23	-1.08	14	8.26	8	1.27	30	81	50	ASH	.	.	Y
235	HCM	13yr	M	10yr	St	N	Father	60	159	Dyspnea, Tachycardia	N	42	-1.13	20	-2.93	15	6.41	8	0.09	.	83	50	ASH	19	9.9	Y
238	HCM	9mo	M	9mo	St	N	-	8.3	65	Dyspnea	N	20	-1.8	8	-0.01	7	4.27	5	1.34	.	89	57	ASH	.	.	N
241	HCM	1yr	M	9mo	St	Y	-	7.8	64	Dyspnea	I	19	-2.22	10.8	-2.16	1.18	11	12.3	27	20	77	43	Concentric	.	.	N
244	HCM	3yr	F	2.5yr	St	N	-	13	85	Recurrent chest infection	I	23	-2.72	7	-5.65	6	1.94	5	0.35	.	96	71	Focal	9	5.87	N
247	HOCM	2y	M	2yr	St	N	-	12.5	86	Dyspnea	I	26	-1.56	9	-4.68	7	3.27	6	1.7	50	89	57	Mid cavitary	.	.	Y
250	HOCM	2.5yr	F	2yr	St	N	-	9	74	Dyspnea , Hepatomegaly	II	23	-1.31	13	-1.65	8	5.07	6	2.52	90	76	43	ASH	13	11.6	N
253	HCM	9yr	M	7yr	St	N	-	30	118	Dyspnea	N	35	-0.92	23	-0.4	12	6.96	7	1	.	80	46	ASH	.	.	N
256	HCM	1yr	F	1yr	St	Y	-	6.7	62	Dyspnea ,Hepatomegaly	II	22	-0.51	6	-4.4	9	7.29	7	4.46	.	95	60	Mid cavitary	11	10.14	Y
259	HCM	6mo	M	3mo	St	Y	-	4.5	55	Tachycardia	I	28	4.39	14	0.42	8	6	7	6.41	.	80	39	Concentric	.	.	N
262	HCM	13yr	F	12yr	St	Y	-	55	157	Syncope	N	37	-2.6	23	-1.88	14.9	6.64	9	0.877	.	69	38	ASH	33	22.86	N
268	HCM	1yr	M	5mo	St	N	-	6.2	56	Dyspnea	N	20	-0.91	11	-1.78	8	5.92	4	0.07	.	77	43	Localized	.	.	N
271	HOCM	3yr	M	2.5yr	St	N	-	10.8	84	Dyspnea ,Hepatomegaly	II	34	1.95	16	-0.91	6	2.15	4	-0.8	50	86	54	Subaortic	8	4.65	N
280	HCM	1.6yr	F	1yr	St	N	-	3	48	Dyspnea	N	18	-2.5	12	-1.9	5	3.5	6	6.4	.	65	34	concentric	.	.	N
										HCM: Hypertrophic Cardiomyopathy, HOCM: Hypertrophic obstructive Cardiomyopathy, F: Female, M: Male, Yr: Year, Mo: Month, Cons.: Consanguinity, Y: Yes, N: No, SIB: Sibling, FH: family history, Pr: Progressive, St: Stationary, Wt: Weight, Ht, Height, NYHA: New York Heart Association, LVEDD: Left ventricular end-diastolic dimension, LVESD: Left ventricular end-systolic dimension, IVS: Interventricu…
